# Supplementary material
Source: HighWire-hosted journal article supplement (https://rmdopen.bmj.com/content/5/1/e000942)
Supplement: inline-supplementary-material-5 [file inline-supplementary-material-5.pdf]

**Long-term Safety of Certolizumab Pegol in Rheumatoid Arthritis, Axial Spondyloarthritis, Psoriatic Arthritis, Psoriasis, and Crohn's Disease: A Pooled Analysis of 11,317 Patients across Clinical Trials**

Jeffrey R. Curtis, Xavier Mariette, Cécile Gaujoux-Viala, Andrew Blauvelt, Tore K. Kvien, William Sandborn, Kevin Winthrop, Marc de Longueville, Ivo Huybrechts, Vivian P. Bykerk

**SUPPLEMENTARY MATERIALS**

**SUPPLEMENTARY TABLES AND FIGURES****Supplementary Table S1.** Opportunistic infections as defined by the OICC and associated MedDRA coded terms

| OICC term <sup>a</sup>                                                                                                               | MedDRA coded term (v18.1)                                                                                                                                                                                                                                                                                                                    |
|--------------------------------------------------------------------------------------------------------------------------------------|----------------------------------------------------------------------------------------------------------------------------------------------------------------------------------------------------------------------------------------------------------------------------------------------------------------------------------------------|
| <b>Definite<sup>b/c</sup></b>                                                                                                        |                                                                                                                                                                                                                                                                                                                                              |
| Aspergillosis (invasive disease only)                                                                                                | Aspergillosis                                                                                                                                                                                                                                                                                                                                |
| Bartonellosis (disseminated disease only)                                                                                            | Bartonellosis                                                                                                                                                                                                                                                                                                                                |
| BK virus disease including PVAN                                                                                                      | Polyomavirus-associated nephropathy                                                                                                                                                                                                                                                                                                          |
| Blastomycosis                                                                                                                        | Blastomycosis                                                                                                                                                                                                                                                                                                                                |
| Candidiasis (invasive disease or oral)                                                                                               | Oral candidiasis or split to oral candidiasis and Candida infection                                                                                                                                                                                                                                                                          |
| Coccidioidomycosis                                                                                                                   | Coccidioidomycosis                                                                                                                                                                                                                                                                                                                           |
| Cryptococcosis                                                                                                                       | Cryptococcosis                                                                                                                                                                                                                                                                                                                               |
| Cytomegalovirus disease                                                                                                              | Cytomegalovirus infection                                                                                                                                                                                                                                                                                                                    |
| HBV reactivation                                                                                                                     | Hepatitis B                                                                                                                                                                                                                                                                                                                                  |
| Herpes simplex (invasive disease only)                                                                                               | Herpes simplex                                                                                                                                                                                                                                                                                                                               |
| Herpes zoster (any form)                                                                                                             | Herpes zoster                                                                                                                                                                                                                                                                                                                                |
| Histoplasmosis                                                                                                                       | Histoplasmosis                                                                                                                                                                                                                                                                                                                               |
| Legionellosis                                                                                                                        | Legionella infection                                                                                                                                                                                                                                                                                                                         |
| Listeria monocytogenes (invasive disease only)                                                                                       | Listeriosis                                                                                                                                                                                                                                                                                                                                  |
| Nocardiosis                                                                                                                          | Nocardiosis                                                                                                                                                                                                                                                                                                                                  |
| Nontuberculous mycobacterium disease                                                                                                 | Mycobacterial infection                                                                                                                                                                                                                                                                                                                      |
| Other invasive fungi: Mucormycosis (=zygomycosis) [Rhizopus, Mucor, and Lichtheimia], Scedosporum/Pseudallescheria boydii, Fusarium] | 1) 'Mucormycosis (=zygomycosis-) [Rhizopus, Mucor, and Lichtheimia] (Invasive fungi)'- coded to 'Zygomycosis'; 2) 'Scedosporum (Invasive fungi)' coded to 'Scedosporium infection'; 3) 'Pseudallescheria boydii (Invasive fungi)'- coded to 'Pseudallescheria infection'; 4) 'Fusarium (II) (Invasive fungi)'- coded to 'Fusarium infection' |
| Pneumocystis jiroveci                                                                                                                | Pneumocystis jiroveci infection                                                                                                                                                                                                                                                                                                              |
| Post-transplant lymphoproliferative disorder (EBV)                                                                                   | Post-transplant lymphoproliferative disorder                                                                                                                                                                                                                                                                                                 |
| Progressive Multifocal Leukoencephalopathy                                                                                           | Progressive multifocal leukoencephalopathy                                                                                                                                                                                                                                                                                                   |
| Salmonellosis (invasive disease only)                                                                                                | Salmonellosis                                                                                                                                                                                                                                                                                                                                |
| Strongyloides (hyperinfection syndrome and disseminated forms only)                                                                  | Strongyloidiasis                                                                                                                                                                                                                                                                                                                             |
| Toxoplasmosis                                                                                                                        | Toxoplasmosis                                                                                                                                                                                                                                                                                                                                |
| Tuberculosis                                                                                                                         | Tuberculosis                                                                                                                                                                                                                                                                                                                                 |
| <b>Probable<sup>d</sup></b>                                                                                                          |                                                                                                                                                                                                                                                                                                                                              |
| Campylobacter (invasive disease only)                                                                                                | Campylobacter infection                                                                                                                                                                                                                                                                                                                      |
| Cryptosporidium species (chronic disease only)                                                                                       | Cryptosporidiosis infection                                                                                                                                                                                                                                                                                                                  |
| HCV progression                                                                                                                      | Hepatitis C                                                                                                                                                                                                                                                                                                                                  |
| Leishmaniasis (visceral only)                                                                                                        | Visceral leishmaniasis                                                                                                                                                                                                                                                                                                                       |
| Microsporidiosis                                                                                                                     | Microsporidia infection                                                                                                                                                                                                                                                                                                                      |
| Paracoccidioides infections                                                                                                          | Paracoccidioides infection                                                                                                                                                                                                                                                                                                                   |
| Penicillium marneffei                                                                                                                | Penicilliosis                                                                                                                                                                                                                                                                                                                                |
| Shigella (invasive disease only)                                                                                                     | Shigella infection                                                                                                                                                                                                                                                                                                                           |
| Sporothrix schenckii                                                                                                                 | Sporotrichosis                                                                                                                                                                                                                                                                                                                               |
| Trypanosoma cruzi infection (Chagas' Disease) (disseminated disease only)                                                            | American trypanosomiasis                                                                                                                                                                                                                                                                                                                     |
| Vibriosis (invasive disease due to V. vulnificus)                                                                                    | Bacterial infection                                                                                                                                                                                                                                                                                                                          |

<sup>a</sup>Based on OICC consensus recommendations.[15] <sup>b</sup>Generally do not occur in the absence of immunosuppression and whose presence suggests a severe alteration in host immunity. <sup>c</sup>Can occur in patients without recognized forms of immunosuppression, but whose presence indicates a potential or likely alteration in host immunity. <sup>d</sup>Published data are currently lacking, but expert opinion believes that risk is likely elevated in the setting of biologic therapy. OICC: Opportunistic Infections Consensus Committee.

**Supplementary Table S2.** Validated MedDRA terms included as potential autoimmune events

| Event type                  | MedDRA coded term (v18.1)                                                                                                       |
|-----------------------------|---------------------------------------------------------------------------------------------------------------------------------|
| Demyelination events        | Multiple sclerosis<br>Optic neuritis<br>Primary progressive multiple sclerosis<br>Demyelinating polyneuropathy                  |
| Lupus and lupus-like events | Lupus-like syndrome<br>Subacute cutaneous lupus erythematosus                                                                   |
| Pulmonary events            | Acute pulmonary oedema<br>Bronchial hyperreactivity<br>Idiopathic pulmonary fibrosis<br>Pulmonary granuloma                     |
| Vasculitis events           | Arteritis<br>Cutaneous vasculitis<br>Haemorrhagic vasculitis<br>Henoch-Schönlein purpura<br>Rheumatoid vasculitis<br>Vasculitis |

MedDRA: Medical Dictionary for Regulatory Activities.

**Supplementary Table S3.** Validated MedDRA terms included as GI-specific SIEs in the sensitivity analysis

| MedDRA coded terms (v18.1)      |                                  |                               |
|---------------------------------|----------------------------------|-------------------------------|
| Abdominal abscess               | Douglas' abscess                 | Oesophageal candidiasis       |
| Abdominal sepsis                | Enteritis infectious             | Oral candidiasis              |
| Abscess intestinal              | Enterocolitis viral              | Rectal abscess                |
| Anal abscess                    | Gallbladder empyema              | Subdiaphragmatic abscess      |
| Anal fistula infection          | Gastroenteritis                  | Pelvic abscess                |
| Anorectal infection             | Gastroenteritis clostridial      | Perineal abscess              |
| Appendiceal abscess             | Gastroenteritis salmonella       | Perineal infection            |
| Campylobacter gastroenteritis   | Gastroenteritis viral            | Perirectal abscess            |
| Clostridium difficile colitis   | Gastroenteritis fungal infection | Peritoneal tuberculosis       |
| Clostridium difficile infection | Gastrointestinal infection       | Peritonitis                   |
| Cytomegalovirus colitis         | Gastrointestinal viral infection | Pseudomembranous colitis      |
| Diverticulitis                  | Helicobacter infection           | Tuberculosis gastrointestinal |

GI: gastrointestinal; MedDRA: Medical Dictionary for Regulatory Activities; SIE: serious infectious event.

**Supplementary Table S4.** Adverse events reported for CZP-treated patients in the combined RCT and OLE periods (RCT+OLE) and PBO-controlled and CZP-treated patients (all doses) in the RCT period

|                           | <b>Overall</b>                |                              | <b>RA</b>                    |                              | <b>axSpA</b>               |                            | <b>PsA</b>                 |                            | <b>PSO</b>                   |                            | <b>CD</b>                    |                            |
|---------------------------|-------------------------------|------------------------------|------------------------------|------------------------------|----------------------------|----------------------------|----------------------------|----------------------------|------------------------------|----------------------------|------------------------------|----------------------------|
|                           | <b>RCT+OLE<br/>(n=11,317)</b> |                              | <b>RCT+OLE<br/>(n=6,927)</b> |                              | <b>RCT+OLE<br/>(n=315)</b> |                            | <b>RCT+OLE<br/>(n=393)</b> |                            | <b>RCT+OLE<br/>(n=1,112)</b> |                            | <b>RCT+OLE<br/>(n=2,570)</b> |                            |
| Total exposure (PY)       | 21,694.9                      |                              | 13,541.6                     |                              | 977.8                      |                            | 1,316.1                    |                            | 1,481.3                      |                            | 4,378.1                      |                            |
| Mean exposure (days)      | 700.2                         |                              | 714.0                        |                              | 1,133.7                    |                            | 1,223.2                    |                            | 486.5                        |                            | 622.2                        |                            |
| Median exposure (days)    | 420.0                         |                              | 413.0                        |                              | 1,371.0                    |                            | 1,456.0                    |                            | 550.0                        |                            | 313.0                        |                            |
|                           | <b>IR/100 PY<br/>[n (%)]</b>  |                              |                              |                              |                            |                            |                            |                            |                              |                            |                              |                            |
| AEs                       | 212.43 [9,805 (86.6)]         |                              | 200.38 [5,951 (85.9)]        |                              | 173.45 [303 (96.2)]        |                            | 162.33 [367 (93.4)]        |                            | 181.08 [899 (80.8)]          |                            | 305.26 [2,285 (88.9)]        |                            |
| Severe AEs                | 11.43 [2,192 (19.4)]          |                              | 9.44 [1,148 (16.6)]          |                              | 5.46 [49 (15.6)]           |                            | 5.90 [71 (18.1)]           |                            | 7.67 [109 (9.8)]             |                            | 23.28 [815 (31.7)]           |                            |
| Deaths                    | 0.40 [87 (0.8)]               |                              | 0.50 [68 (1.0)]              |                              | 0                          |                            | 0.46 [6 (1.5)]             |                            | 0.27 [4 (0.4)]               |                            | 0.21 [9 (0.4)]               |                            |
| AEs leading to withdrawal | 8.65 [1,842 (16.3)]           |                              | 6.92 [924 (13.3)]            |                              | 4.96 [48 (15.2)]           |                            | 3.82 [50 (12.7)]           |                            | 4.29 [63 (5.7)]              |                            | 18.07 [757 (29.5)]           |                            |
| SAEs                      | 14.33 [2,655 (23.5)]          |                              | 13.01 [1,505 (21.7)]         |                              | 7.81 [69 (21.9)]           |                            | 8.76 [100 (25.4)]          |                            | 9.06 [127 (11.4)]            |                            | 24.19 [854 (33.2)]           |                            |
|                           | <b>RCT PBO<br/>(n=3,092)</b>  | <b>RCT CZP<br/>(n=6,467)</b> | <b>RCT PBO<br/>(n=1,759)</b> | <b>RCT CZP<br/>(n=4,248)</b> | <b>RCT PBO<br/>(n=107)</b> | <b>RCT CZP<br/>(n=218)</b> | <b>RCT PBO<br/>(n=136)</b> | <b>RCT CZP<br/>(n=273)</b> | <b>RCT PBO<br/>(n=215)</b>   | <b>RCT CZP<br/>(n=809)</b> | <b>RCT PBO<br/>(n=875)</b>   | <b>RCT CZP<br/>(n=919)</b> |
| Total exposure (PY)       | 1184.3                        | 3016.9                       | 774.7                        | 2259.9                       | 38.5                       | 98.9                       | 50.6                       | 122.0                      | 58.8                         | 237.3                      | 261.7                        | 298.7                      |
| Mean exposure (days)      | 139.9                         | 170.4                        | 160.9                        | 194.3                        | 131.4                      | 165.7                      | 135.9                      | 163.3                      | 99.8                         | 107.1                      | 109.3                        | 118.7                      |
| Median exposure (days)    | 112.0                         | 137.0                        | 113.0                        | 168.0                        | 113.0                      | 168.0                      | 116.0                      | 168.0                      | 112.0                        | 112.0                      | 84.0                         | 112.0                      |
|                           | <b>IR/100 PY<br/>[n (%)]</b>  |                              |                              |                              |                            |                            |                            |                            |                              |                            |                              |                            |
| AEs                       | 378.62 [2069 (66.9)]          | 343.09 [4555 (70.4)]         | 328.87 [1,166 (66.3)]        | 322.86 [3,058 (72.0)]        | 311.86 [67 (62.6)]         | 323.39 [162 (74.3)]        | 340.56 [92 (67.6)]         | 311.71 [192 (70.3)]        | 386.69 [134 (62.3)]          | 346.91 [496 (61.3)]        | 560.88 [610 (69.7)]          | 514.28 [647 (70.4)]        |
| Severe AEs                | 21.86 [247 (8.0)]             | 16.42 [478 (7.4)]            | 16.61 [124 (7.0)]            | 14.91 [326 (7.7)]            | 18.85 [7 (6.5)]            | 8.20 [8 (3.7)]             | 6.01 [3, (2.2)]            | 11.75 [14 (5.1)]           | 22.98 [13 (6.0)]             | 11.52 [27 (3.3)]           | 41.71 [100 (11.4)]           | 37.56 [103 (11.2)]         |
| Deaths                    | 0.25 [3 (0.1)]                | 0.50 [15 (0.2)]              | 0.26 [2 (0.1)]               | 0.58 [13 (0.3)]              | 0                          | 0                          | 0                          | 1.64 [2 (0.7)]             | 0                            | 0                          | 0.38 [1 (0.1)]               | 0.00 [0 (0.0)]             |
| AEs leading to withdrawal | 15.61 [181 (5.9)]             | 12.05 [357 (5.5)]            | 10.51 [80 (4.5)]             | 11.26 [250 (5.9)]            | 5.24 [2 (1.9)]             | 5.09 [5 (2.3)]             | 6.00 [3 (2.2)]             | 7.42 [9 (3.3)]             | 5.13 [3 (1.4)]               | 5.08 [12 (1.5)]            | 37.03 [93 (10.6)]            | 28.14 [81 (8.8)]           |
| SAEs                      | 15.46 [177 (5.7)]             | 18.00 [521 (8.1)]            | 12.80 [96 (5.5)]             | 17.18 [372 (8.8)]            | 13.35 [5 (4.7)]            | 11.43 [11 (5.0)]           | 14.29 [7 (5.1)]            | 17.78 [21 (7.7)]           | 13.97 [8 (3.7)]              | 12.41 [29 (3.6)]           | 24.33 [61 (7.0)]             | 31.35 [88 (9.6)]           |

n (%) refers to the number of patients with events; zeros indicate that there were no cases. All reported confidence intervals can only be interpreted in an exploratory manner, i.e. are nominal. AE: adverse event; axSpA: axial spondyloarthritis; CD: Crohn's disease; CI: confidence interval; ER: event rate (includes repeat occurrences of the same AE in individual patients, with the denominator being the total duration of exposure); IR: incidence rate (the number of new cases per 100 PY, with the denominator being the exposure duration up to the first occurrence of a particular AE); OLE: open-label extension; PBO: placebo; PsA: psoriatic arthritis; PSO: psoriasis; PY: patient-years; RA: rheumatoid arthritis; RCT: randomized controlled trial; SAE: serious adverse event.

**Supplementary Table S5.** Adverse events reported for patients treated with 200 mg Q2W CZP or 400 mg Q2W CZP in the RCT CZP population

|                                                    | Overall, RCT CZP                         |                                         | RA                                       |                                         | PSO                                     |                                         |
|----------------------------------------------------|------------------------------------------|-----------------------------------------|------------------------------------------|-----------------------------------------|-----------------------------------------|-----------------------------------------|
|                                                    | CZP<br>200 mg Q2W<br>(n=3,560)           | CZP<br>400 mg Q2W<br>(n=1,391)          | CZP<br>200 mg Q2W<br>(n=2,871)           | CZP<br>400 mg Q2W<br>(n=737)            | CZP<br>200 mg Q2W<br>(n=410)            | CZP<br>400 mg Q2W<br>(n=399)            |
| Total exposure (PY)                                | 1812                                     | 617                                     | 1574                                     | 467                                     | 120                                     | 117                                     |
| Mean exposure (days)                               | 185.9                                    | 162.1                                   | 200.3                                    | 231.3                                   | 106.8                                   | 107.5                                   |
| Median exposure (days)                             | 131.5                                    | 112.0                                   | 167.0                                    | 182.0                                   | 112.0                                   | 112.0                                   |
|                                                    | <b>IR/100 PY (95% CI)<br/>n (%)</b>      |                                         |                                          |                                         |                                         |                                         |
| AEs                                                | 322.39 (309.86, 335.30)<br>[2493 (70.0)] | 300.51 (281.22, 320.78)<br>[902 (64.8)] | 321.47 (307.73, 335.68)<br>[2056 (71.6)] | 242.52 (221.93, 264.51)<br>[510 (69.2)] | 328.28 (288.06, 372.54)<br>[240 (58.5)] | 366.41 (322.90, 414.15)<br>[256 (64.2)] |
| Severe AEs                                         | 12.20 (10.62, 13.95)<br>[215 (6.0)]      | 16.47 (13.37, 20.07)<br>[98 (7.0)]      | 12.56 (10.85, 14.47)<br>[192 (6.7)]      | 13.83 (10.60, 17.73)<br>[62 (8.4)]      | 9.28 (4.63, 16.61)<br>[11 (2.7)]        | 13.82 (7.90, 22.44)<br>[16 (4.0)]       |
| Deaths                                             | 0.50 (0.23, 0.94)<br>[9 (0.3)]           | 0.81 (0.26, 1.89)<br>[5 (0.4)]          | 0.51 (0.22, 1.00)<br>[8 (0.3)]           | 1.07 (0.35, 2.50)<br>[5 (0.7)]          | 0                                       | 0                                       |
| AEs leading to withdrawal                          | 9.65 (8.26, 11.20)<br>[172 (4.8)]        | 10.87 (8.41, 13.83)<br>[66 (4.7)]       | 10.34 (8.80, 12.07)<br>[160 (5.6)]       | 10.89 (8.08, 14.36)<br>[50 (6.8)]       | 5.03 (1.85, 10.95)<br>[6 (1.5)]         | 5.14 (1.89, 11.19)<br>[6 (1.5)]         |
| SAEs                                               | 14.25 (12.54, 16.14)<br>[249 (7.0)]      | 20.79 (17.26, 24.82)<br>[122 (8.8)]     | 15.13 (13.23, 17.22)<br>[229 (8.0)]      | 19.05 (15.19, 23.58)<br>[84 (11.4)]     | 5.89 (2.37, 12.13)<br>[7 (1.7)]         | 19.16 (12.01, 29.01)<br>[22 (5.5)]      |
| <b>SIEs</b>                                        | 4.40 (3.48, 5.49)<br>[79 (2.2)]          | 5.44 (3.74, 7.64)<br>[33 (2.4)]         | 4.75 (3.73, 5.96)<br>[74 (2.6)]          | 5.69 (3.72, 8.33)<br>[26 (3.5)]         | 0.83 (0.02, 4.65)<br>[1 (0.2)]          | 3.42 (0.93, 8.76)<br>[4 (1.0)]          |
| OIs including TB disease                           | 0.94 (0.55, 1.51)<br>[17 (0.5)]          | 0.81 (0.26, 1.89)<br>[5 (0.4)]          | 1.02 (0.58, 1.65)<br>[16 (0.6)]          | 0.86 (0.23, 2.20)<br>[4 (0.5)]          | 0                                       | 0.85 (0.02, 4.75)<br>[1 (0.3)]          |
| TB disease                                         | 0.44 (0.19, 0.87)<br>[8 (0.2)]           | 0.81 (0.26, 1.89)<br>[5 (0.4)]          | 0.51 (0.22, 1.00)<br>[8 (0.3)]           | 0.86 (0.23, 2.20)<br>[4 (0.5)]          | 0                                       | 0.85 (0.02, 4.75)<br>[1 (0.3)]          |
| Herpes zoster                                      | 0.22 (0.06, 0.57)<br>[4 (0.1)]           | 0                                       | 0.19 (0.04, 0.56)<br>[3 (0.1)]           | 0                                       | 0                                       | 0                                       |
| <b>All malignancies</b>                            | 0.77 (0.42, 1.30)<br>[14 (0.4)]          | 0.65 (0.18, 1.66)<br>[4 (0.3)]          | 0.89 (0.49, 1.49)<br>[14 (0.5)]          | 0.43 (0.05, 1.55)<br>[2 (0.3)]          | 0                                       | 0.85 (0.02, 4.75)<br>[1 (0.3)]          |
| All malignancies excluding NMSC                    | 0.61 (0.30, 1.09)<br>[11 (0.3)]          | 0.49 (0.10, 1.42)<br>[3 (0.2)]          | 0.70 (0.35, 1.25)<br>[11 (0.4)]          | 0.43 (0.05, 1.55)<br>[2 (0.3)]          | 0                                       | 0                                       |
| Melanoma                                           | 0.06 (0.00, 0.31)<br>[1 (0.0)]           | 0                                       | 0.06 (0.00, 0.35)<br>[1 (0.0)]           | 0                                       | 0                                       | 0                                       |
| Lymphoma, including Hodgkin's disease <sup>a</sup> | 0.06 (0.00, 0.31)<br>[1 (0.0)]           | 0.16 (0.00, 0.90)<br>[1 (0.1)]          | 0.06 (0.00, 0.35)<br>[1 (0.0)]           | 0.21 (0.01, 1.19)<br>[1 (0.1)]          | 0                                       | 0                                       |
| NMSC                                               | 0.17 (0.03, 0.48)<br>[3 (0.1)]           | 0.16 (0.00, 0.90)<br>[1 (0.1)]          | 0.19 (0.04, 0.56)<br>[3 (0.1)]           | 0                                       | 0                                       | 0.85 (0.02, 4.75)<br>[1 (0.3)]          |
| <b>Other Events of Interest</b>                    |                                          |                                         |                                          |                                         |                                         |                                         |
| MACE                                               | 0.77 (0.42, 1.30)<br>[14 (0.4)]          | 0.97 (0.36, 2.12)<br>[6 (0.4)]          | 0.76 (0.39, 1.33)<br>[12 (0.4)]          | 1.07 (0.35, 2.50)<br>[5 (0.7)]          | 0                                       | 0.85 (0.02, 4.75)<br>[1 (0.3)]          |
| GI perforations                                    | 0                                        | 0                                       | 0                                        | 0                                       | 0                                       | 0                                       |
| New-onset or worsening psoriasis <sup>b</sup>      | 0                                        | 0.16 (0.00, 0.90)<br>[1 (0.1)]          | 0                                        | 0                                       | 0                                       | 0.85 (0.02, 4.75)<br>[1 (0.3)]          |
| Venous thromboembolism <sup>c</sup>                | 0.28 (0.09, 0.64)<br>[5 (0.1)]           | 0.16 (0.00, 0.90)<br>[1 (0.1)]          | 0.32 (0.10, 0.74)<br>[5 (0.2)]           | 0.21 (0.01, 1.20)<br>[1 (0.1)]          | 0                                       | 0                                       |
| Pulmonary embolism (SAEs only) <sup>d</sup>        | 0.06 (0.00, 0.31)<br>[1 (0.0)]           | 0.16 (0.00, 0.90)<br>[1 (0.1)]          | 0.06 (0.00, 0.35)<br>[1 (0.0)]           | 0.21 (0.01, 1.20)<br>[1 (0.1)]          | 0                                       | 0                                       |

n (%) refers to the number of patients with events; zeros indicate that there were no cases. NMSC includes serious and non-serious cases. All reported confidence intervals can only be interpreted in an exploratory manner, i.e. are nominal. <sup>a</sup>There were no Hodgkin's disease cases in these patient subgroups. <sup>b</sup>Worsening psoriasis defined as psoriasis reported as an adverse event in a patient enrolled in a PSO study; new-onset psoriasis defined as psoriasis in a patient enrolled in a non-PSO study. <sup>c</sup>Includes serious and non-serious deep vein thrombosis and pulmonary embolism events. <sup>d</sup>There were no non-serious pulmonary embolism events in these subgroups of patients. CI: confidence intervals; GI: gastrointestinal; IR: incidence rate (the number of new cases per 100 PY, with the denominator being the exposure duration up to the first occurrence of a particular AE); MACE: major adverse cardiovascular events; NMSC: non-melanoma skin cancer; OI: opportunistic infection; PSO: psoriasis; PY: patient-years; Q2W: every two weeks; RA: rheumatoid arthritis; SAE: serious adverse event; SIE: serious infectious event; TB: tuberculosis.

### **Supplementary Figure S1.** Summary of RA study designs (data cut-off: August 2017)

Concomitant MTX dosing not shown. <sup>#</sup>For maintenance in RA, CZP 100 mg Q2W is not an approved dose in the European Union. <sup>†</sup>For maintenance in RA, CZP 400 mg Q2W is not an approved dose in the European Union. <sup>\*</sup>For maintenance in RA, CZP 400 mg Q4W before clinical response is confirmed is not an approved dose in the European Union. ACR20: American College of Rheumatology 20 criteria; ADA: adalimumab; CDAI: Crohn's Disease Activity Index; CZP: certolizumab pegol; DMARD: disease-modifying antirheumatic drug; MTX: methotrexate; OLE: open-label extension; Q2W: every 2 weeks; Q4W: every 4 weeks; RCT: randomized controlled trial.

### **Supplementary Figure S2.** RAPID-axSpA and RAPID-PsA study designs (data cut offs: both April 2016)

ASAS20: Assessment of SpondyloArthritis international Society 20 criteria; axSpA: axial spondyloarthritis; CZP: certolizumab pegol; OLE: open-label extension; PBO: placebo; PsA: psoriatic arthritis; Q2W: every 2 weeks; Q4W: every 4 weeks; SJC: swollen joint count; TJC: tender joint count; Wk: week.

### **Supplementary Figure S3.** Summary of PSO study designs (data cut-off: August 2017)

The use of 400 mg loading doses of CZP at Weeks 0, 2 and 4, or upon re-randomization to CZP, was consistent across all studies, except for C87040 and C87044, where single CZP 400 mg loading doses were given at study entry. <sup>\*</sup>Responders at Week 12 of study C87040 with relapse between Week 12 and Week 36 were eligible for retreatment with C87044. Patients received same treatment dose as received in first treatment study. No patients who received placebo were eligible for enrolment in the re-treatment study as no placebo responders relapsed. <sup>‡</sup>During the CIMPACT study, any patients who did not achieve PASI75 at Week 16 entered the escape arm for treatment with CZP 400 mg Q2W. For all other patients, those randomized to ETN 50 mg BIW at Week 0 were re-randomized at Week 16 to treatment with CZP 200 mg Q2W (after a 400 mg Q2W loading dose at Weeks 16, 18 and 20) or PBO. Patients randomized to CZP 200 mg Q2W at Week 0 were re-randomized at Week 16 to treatment with CZP 200 mg Q2W, CZP 400 mg Q4W or PBO. Patients randomized to CZP 400 mg Q2W at Week 0 were re-randomized at Week 16 to treatment with CZP 200 mg Q2W, CZP 400 mg Q2W or PBO. BIW: twice every week; CZP: certolizumab pegol; ETN: etanercept; OL: open-label; PBO: placebo; PSO: psoriasis; Q2W: every 2 weeks; Q4W: every 4 weeks.

### **Supplementary Figure S4.** Summary of CD study designs (data cut-off: April 2012)

<sup>\*</sup>Patients received one subcutaneous injection of 200 mg CZP and one injection of PBO on Weeks 0, 2 and 4. <sup>†</sup>Dosing started at Week 2 of COSPAR II/CONCISE 2. Non-completers of COSPAR/CONCISE received the loading dose of 400 mg Q2W at Weeks 2, 4 and 6. CD: Crohn's disease; CZP: certolizumab pegol; DB: double-blind; OL: open-label; OLE: open-label extension; PBO: placebo; Q2W: every 2 weeks; Q4W: every 4 weeks; wk: week.

**Supplementary Figure S5.** Incidence rates over time of SAEs, malignancies, and TB pre-2007 and from 2007 onwards across the different indications for CZP-treated patients in the combined RCT and OLE periods (RCT+OLE)

- A.** SAE incidence rates over time by indication in RCT+OLE patients
- B.** TB disease incidence rates pre-2007 and from 2007 onwards over time in RA and CD RCT+OLE patients
- C.** Malignancy incidence rates over time by indication in RCT+OLE patients

Pre-2007 and 2007 onwards refer to the date of treatment initiation with CZP. Before 2007, the threshold for a positive result on the purified protein derivative (PPD) tuberculin skin test varied (from  $\geq 5$  to  $\geq 20$  mm) according to geographic region. Since 2007, CZP recommendations internationally mandate that all patients with PPD  $\geq 5$  mm receive treatment for latent TB infection. After 50 months in axSpA, the malignancy IR was noticeably higher, but due to the small population at this point (after the end of the 4-year RAPID-axSpA study); the CI is therefore wide and the significance unknown. axSpA: axial spondyloarthritis; CD: Crohn's disease; CZP: certolizumab pegol; IR: incidence rate; OLE: open-label extension; PsA: psoriatic arthritis; PSO: psoriasis; PY: patient-years; RA: rheumatoid arthritis; SAE: serious adverse event.

**Supplementary Figure S6.** Kaplan-Meier graphs for time to first expert-confirmed SIE

- A.** Kaplan-Meier graph of time to first expert-confirmed SIE: 0–8 years exposure
- B.** Kaplan-Meier graph of time to first expert-confirmed SIE: 0–2 years exposure (taken from panel A)

axSpA: axial spondyloarthritis; CD: Crohn's disease; CZP: certolizumab pegol; PsA: psoriatic arthritis; PSO: psoriasis; RA: rheumatoid arthritis; SIE: serious infectious event.
